# Supplementary material for: Disappearance of SARS-CoV-2 Antibodies in Infants Born to Women with COVID-19, Wuhan, China
Source: PubMed Central journal article supplement (PMC7510696; doi:10.3201/eid2610.202328), 2020-10
Supplement: 20-2328-Techapp-s1.pdf [file 20-2328-Techapp-s1.pdf]

# Disappearance of SARS-CoV-2 Antibodies in Infants Born to Women with COVID-19, Wuhan, China

## Appendix

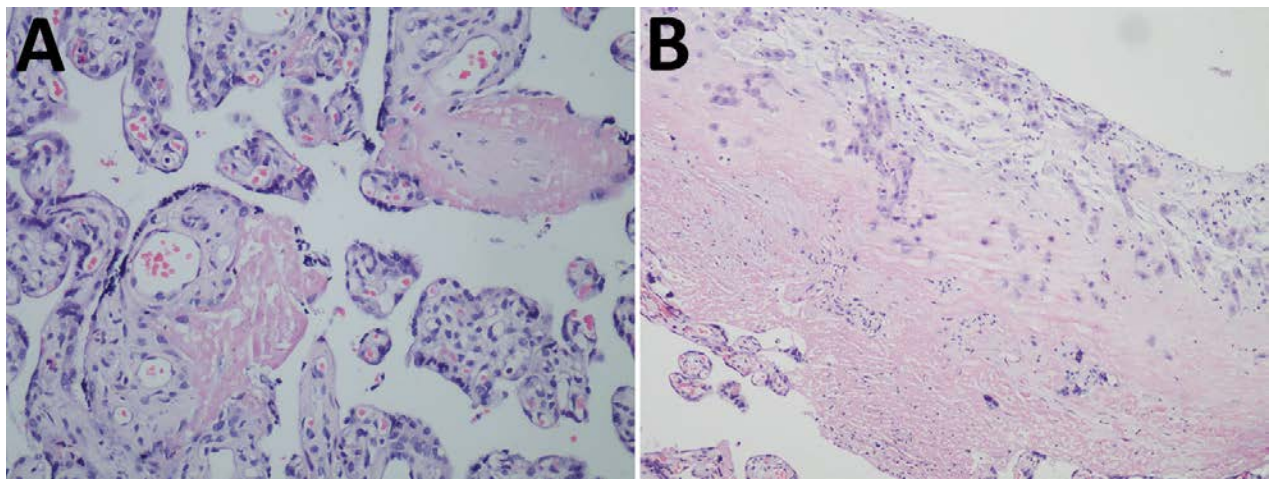

**Appendix Figure.** Pathologic examination of the placenta. A) Normal placenta villi. B) Slight fibrin deposition and lymphocytes infiltrate.
